# Supplementary material for: A gain-of-function single nucleotide variant creates a new promoter which acts as an orientation-dependent enhancer-blocker
Source: PubMed Central journal article supplement (PMC8217497; doi:10.1038/s41467-021-23980-6), 2021-06-21
Supplement: 41467_2021_23980_MOESM1_ESM.pdf [file 41467_2021_23980_MOESM1_ESM.pdf]

8 encompasses; the fourth and fifth column are the start and stop positions of the CNV region in human genome hg18; the  
9 sixth column indicates the type of mutation: LOH – loss of heterozygosity; Duplication - gain of one copy; 1 copy deletion -  
10 loss of one copy; the last column lists the genes affected by the abnormality. **C)** Gating strategy for FACS analysis. **D)** First  
11 panel: representative FACS analysis for cell surface iron Transferrin receptor - 1 (CD71) and cell surface glycoprotein  
12 Glycophorin A (CD235a or GPA) on day 21 of differentiation. Second panel: modified Wright stain of differentiation culture  
13 cells at day 21. Black bar represents 10µm. Each line was differentiated least twice. Line names are shown in black; instance  
14 of replicate is indicated after name.  
15

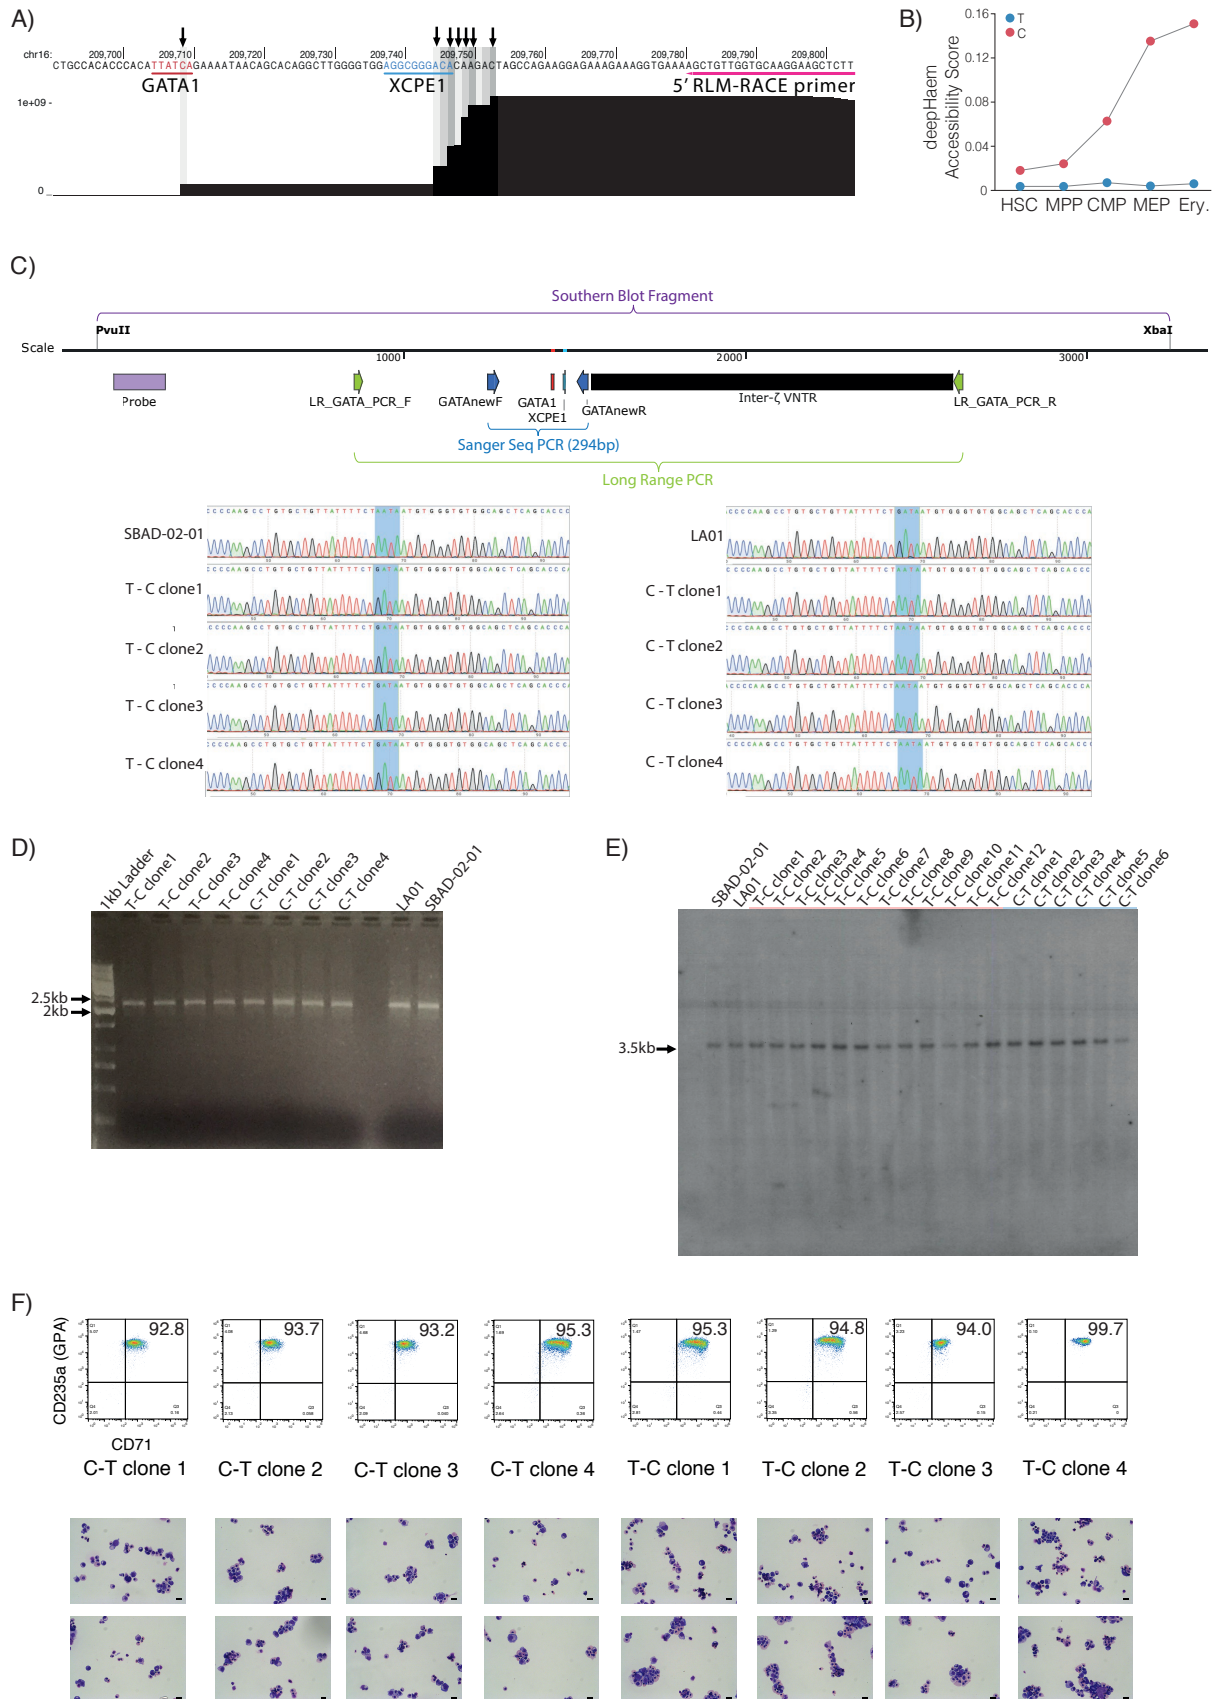

16

17 **Supplementary Figure 2. Transcription start site mapping, variant editing quality control and differentiation**

18 **characterisation**

19 **A)** Transcription start site mapping as measured by 5' RLM-RACE coupled with NGS (RPKM normalised). The GATA1 site is  
20 indicated in red, the promoter element XCPE1 is indicated in blue, the 5' RLM-RACE primer is shown in pink and the 5' ends  
21 of reads are highlighted and indicated with black arrows. Read-densities represent one 5' RLM-RACE experiment from one  
22 erythroid differentiation of iPSC line LA01. Reads were mapped to the wild type genome. Coordinates (hg19) chr16: 209,691-  
23 209,804. **B)** DNA accessibility prediction scores, between 0 (closed) and 1 (open), using the deepHaem convolutional neural  
24 network for 1kb reference sequence (hg19; chr16:209,209-210,209) with each of the two alleles at chr16:209,709.  
25 Predictions were generated for Haematopoietic stem and progenitor cells (HSC), multi-potent progenitor cells (MPP),  
26 common myeloid progenitors (CMP), myeloid-erythroid progenitors (MEP) and CD71<sup>+</sup> CD235<sup>+</sup> Erythroid cells (Ery.). **C)** Top  
27 panel illustrates a 3.4kb fragment around the C-SNV (hg19, chr16:208,272-211,622). The Sanger sequencing PCR fragment  
28 (294bp) and associated primers are indicated in blue. The long-range PCR fragment (around 2.3kb: exact size undetermined  
29 as the region encompasses a VNTR) and associated primers are indicated in green. The Southern plot fragment (fragment  
30 should be >3.8kb based on long range PCR) and probe are highlighted in purple. Lower panel shows Sanger sequencing traces  
31 (sequencing primer GATAnewF): left – SBAD-02-01 unedited line and edited (T-C) clones; right – LA01 unedited line and  
32 edited (C-T) clones. **D)** Long range PCR (primers: LR\_GATA\_PCR\_F + R; ladder: O'GeneRuler 1kb) for edited (T-C) clones and  
33 isogenic control line SBAD-02-01, and edited (C-T) clones and isogenic control line LA01. PCR was replicated twice;  
34 representative image is shown. **E)** Southern blot for edited (T-C) clones and isogenic control line SBAD-02-01, and edited (C-  
35 T) clones and isogenic control line LA01, digested with *PvuII* and *XbaI*, probe sequence can be found in *Supp.Tbl.1*. Southern  
36 blot was performed once. **F)** First panel: representative FACS analysis for cell surface iron Transferrin receptor - 1 (CD71) and  
37 cell surface glycoprotein Glycophorin A (CD235a or GPA) on day 21 of differentiation. Second panel: modified Wright stain  
38 of differentiation culture cells at day 21. Black bar represents 10µm. Each clone was differentiated once. Line names are  
39 shown in black.

40

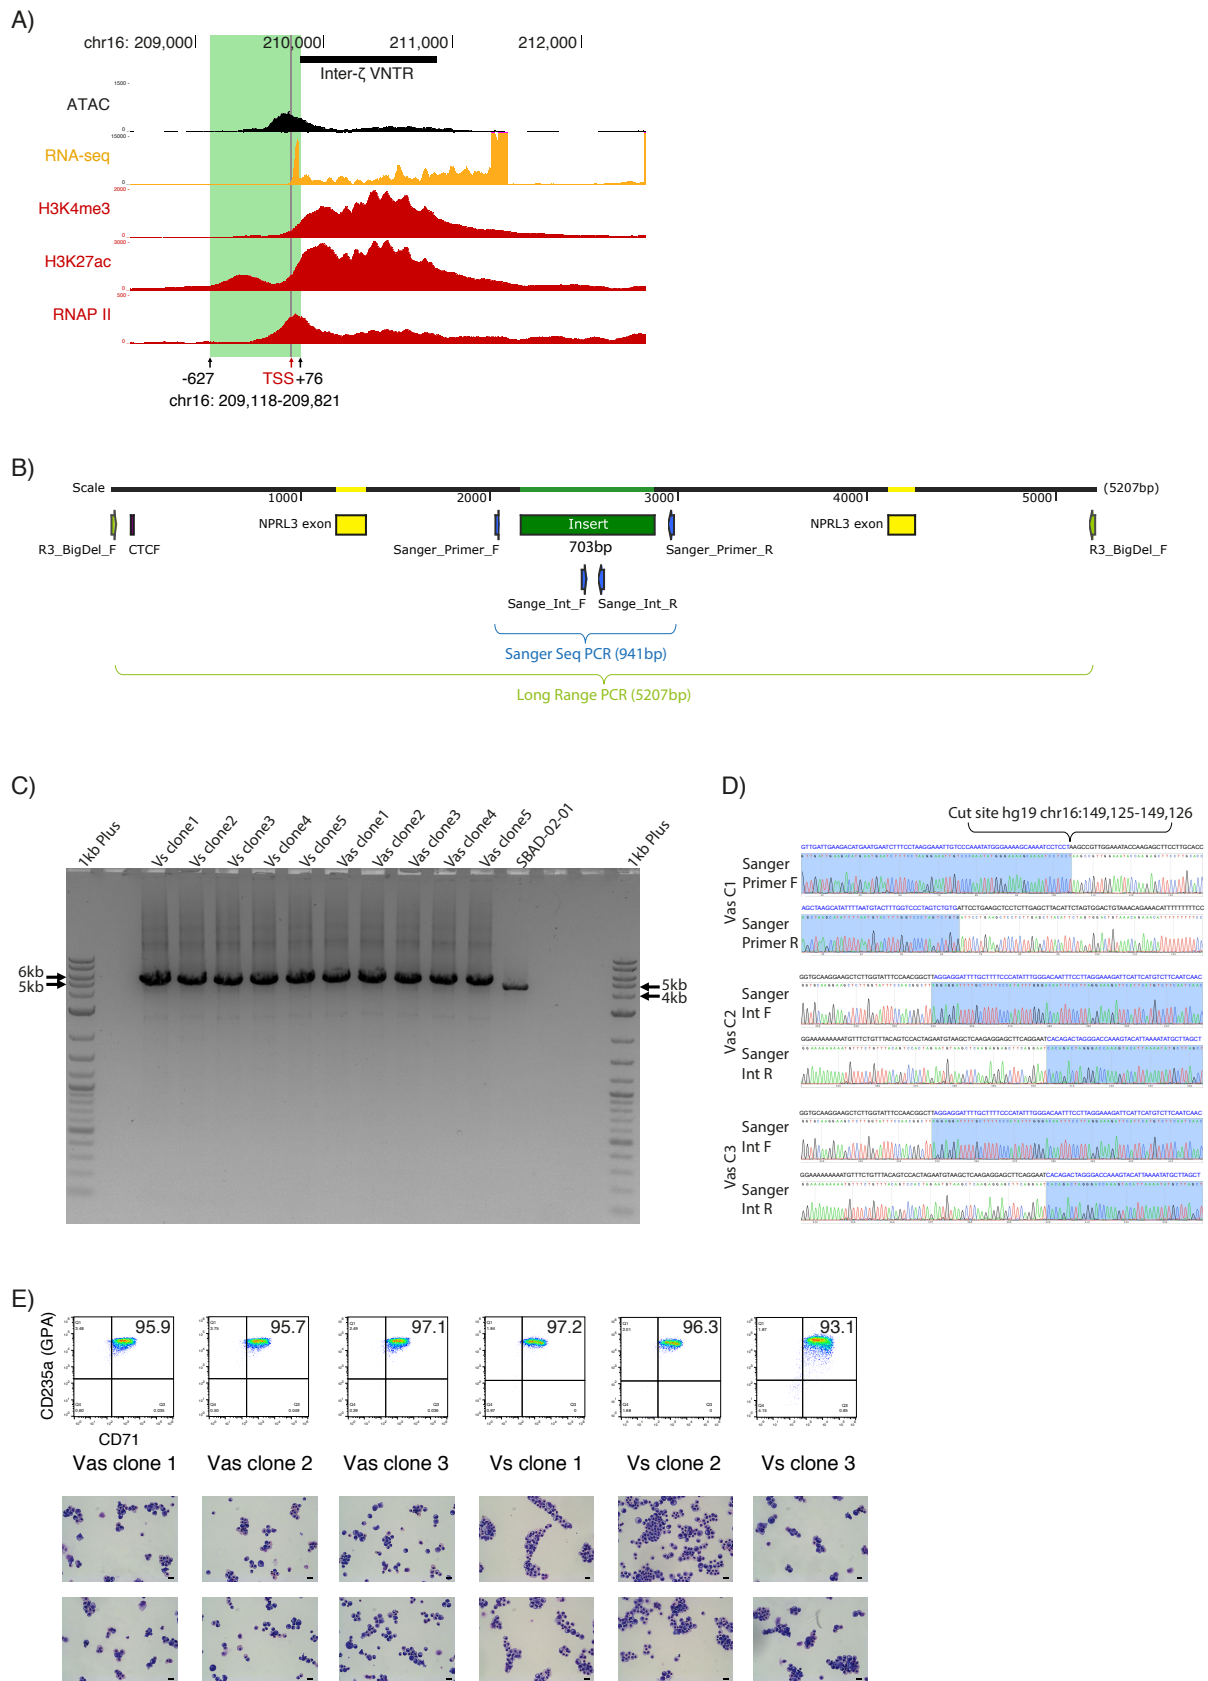

41

42

Supplementary figure 3. Novel promoter insertion design and editing quality control.

43 **A)** Epigenetic landscape and transcription profile of the site of the novel promoter. The sequence used for transposition is  
44 highlighted in green and the distance from the +1 site (labelled as TSS in red; hg19 chr16:209,746) of the *XCPE1* promoter  
45 element are shown below. Coordinates (hg19) chr16: 208,000-213,000. **B)** Illustration of a 5207 bp region around the  
46 promoter insertion site (hg 19 chr16:146,125-149,126) with promoter insert in dark green and *NPRL3* exons in yellow. The  
47 Sanger sequencing PCR fragment (941bp) and associated primers, including internal sequencing primers, are indicated in  
48 blue. The long-range PCR fragment (5207bp) and associated primers are indicated in light green. **C)** Long range PCR (primers:  
49 R3\_BigDel\_F + R; ladder: NEB 1kb PLUS) for edited clones (sense insertion - Vs; antisense insertion - Vas) and isogenic control  
50 line SBAD-02-01. PCR was replicated twice; representative image is shown. **D)** Sanger sequencing traces for antisense  
51 insertion clones, clone name and sequencing primer indicated on the left. **E)** First panel: representative FACS analysis for cell  
52 surface iron Transferrin receptor - 1 (CD71) and cell surface glycoprotein Glycophorin A (CD235a or GPA) on day 21 of  
53 differentiation. Second panel: modified Wright stain of differentiation culture cells at day 21. Black bar represents 10µm.  
54 Each clone was differentiated once. Line names are shown in black.

55

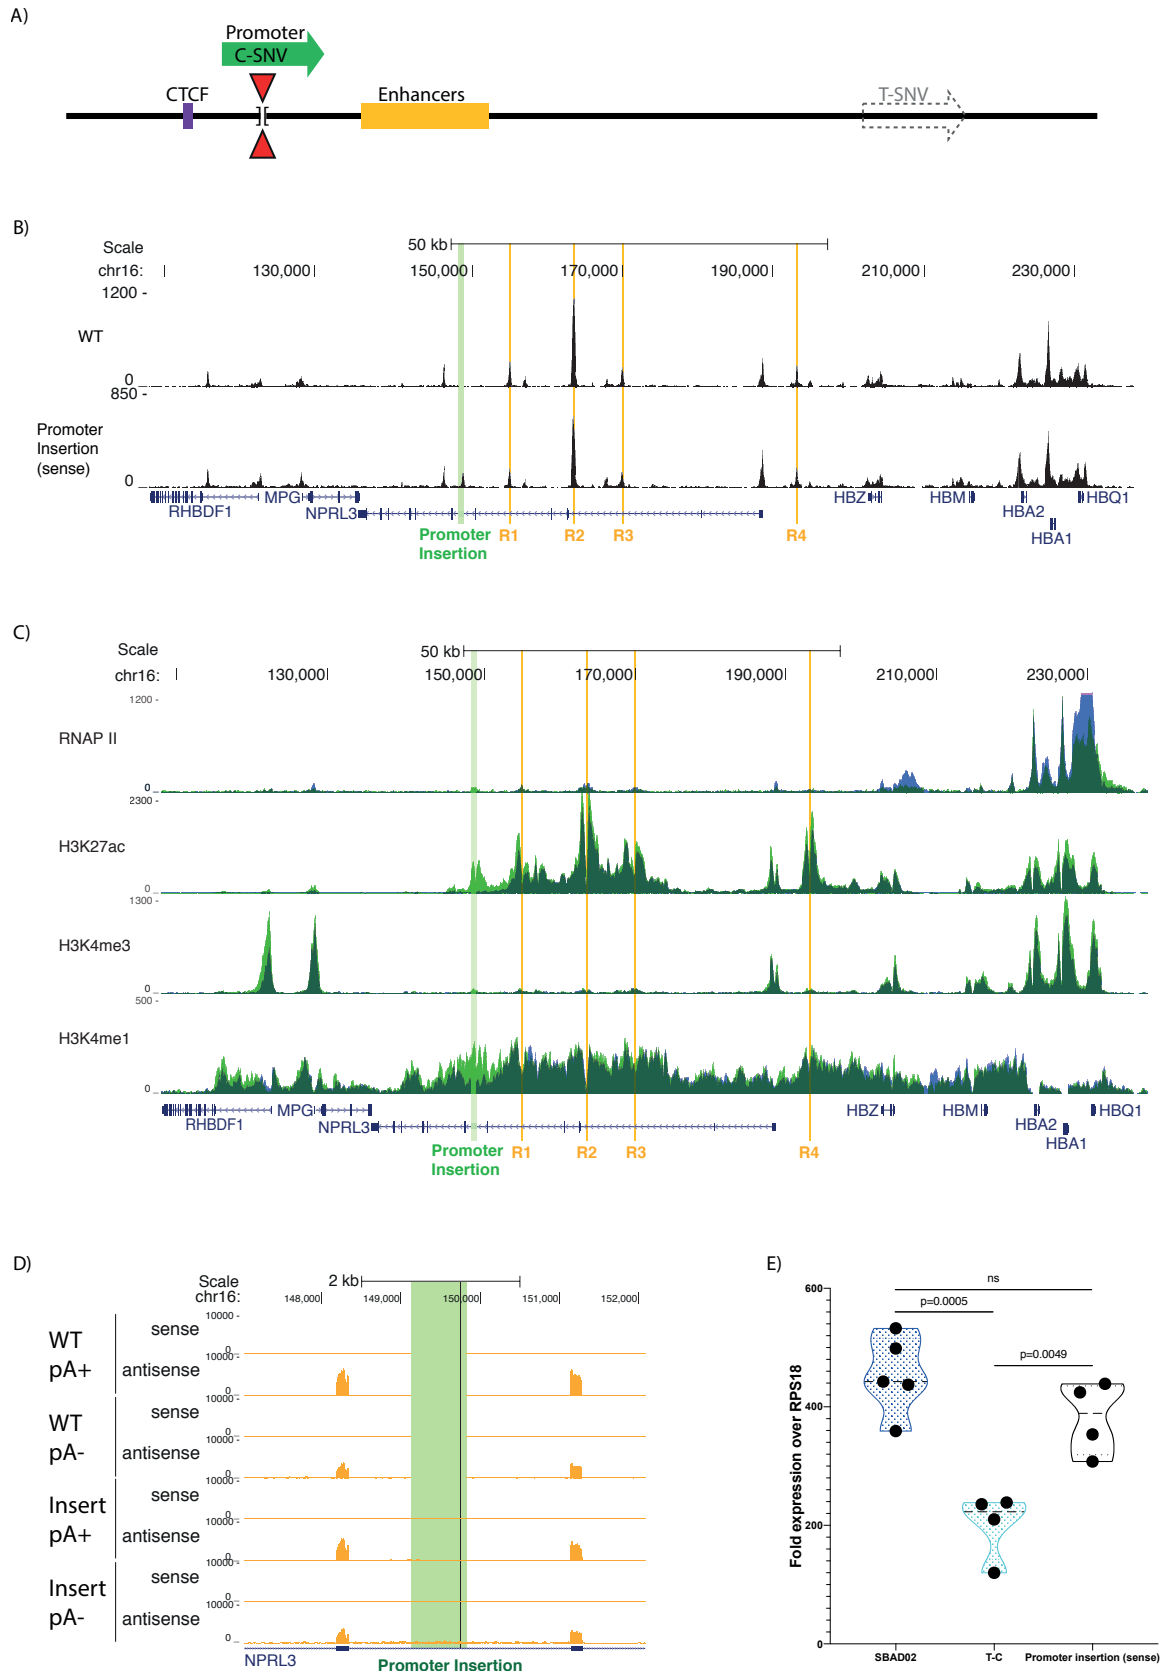

56

57 **Supplementary figure 4. Placing the novel promoter behind the enhancers in the sense orientation does not produce a**

58 **promoter element.**

59 **A)** The active promoter sequence (703bp) was placed behind the  $\alpha$ -globin enhancers in the sense orientation. **B)** Chromatin  
60 accessibility in the  $\alpha$ -globin locus as measured by ATAC-seq (normalised to 100 million reads). The enhancer elements (R1 to  
61 R4) are indicated in orange, the inserted promoter is indicated in green (labelled Promoter insertion), gene annotation by  
62 Refseq is in blue. Read-densities represent an average of: 3 independent experiments for wild type iPSC line SBAD-02-01  
63 (labelled WT), 3 clones of edited SBAD-02-01 cells where the 703bp of the active promoter sequence is inserted behind R1  
64 in the sense orientation (labelled as Promoter Insertion); all lines differentiated to erythroblasts. Reads were mapped to a  
65 custom genome which contains the 703bp promoter insertion in sense. Coordinates (hg19) chr16:108,000-238,000. **C)** ChIP-  
66 seq (normalised to 100 million reads), highlighted regions are as in a). Read-densities represent an average of 3 independent  
67 experiments for wild type iPSC line SBAD-02-01 (in blue), 3 clones of edited SBAD-02-01 cells where the 703bp of the active  
68 promoter sequence is inserted behind R1 in the sense orientation (in green) differentiated to erythroblasts. The tracks are  
69 overlaid on top of each other, the darker colour indicates shared signal while green and blue indicate signal unique for  
70 the promoter insertion and wild type lines, respectively. Reads were mapped to a custom genome which contains the 703bp  
71 promoter insertion in sense. Coordinates (hg19) chr16:108,000-238,000. **D)** Strand-specific RNA-seq of polyadenylated  
72 selected (pA+) and non-polyadenylated (pA-) RNA, read density (in RPKM) represents an average of 3 independent  
73 experiments, 3 replicates for wild type line SBAD-02-01 or 3 clones of edited SBAD-02-01 cells where the 703bp of the active  
74 promoter sequence is inserted behind R1 in the sense orientation differentiated to erythroid cells. The region of the  
75 promoter insertion is indicated in green, the TSS is marked by a black line, gene annotation by Refseq is in blue. Coordinates  
76 (hg19) chr16:147,000-152,000. **E)** qPCR quantification of HBA1/HBA2 in reference to RPS18 in mRNA obtained from  
77 independent differentiation experiments: 5 from wild type iPSC line SBAD-02-01 (WT), 4 clones of edited SBAD-02-01 cells  
78 where the T base at position 209,709 (hg19) of chr16 was changed to a C (labelled T - C), 3 clones of edited SBAD-02-01 cells  
79 where the 703bp of the active promoter sequence is inserted behind R1 in the sense orientation (labelled as Promoter  
80 Insertion (sense)). WT (n=5) in blue, T - C (n=4) in cyan, Promoter Insertion (n=3) in black/white. Violin plots display median  
81 (dashed black line) quartile lines (coloured dotted line) and individual data points (black dots). P-values are obtained using  
82 unpaired, two-tailed student t-test.

83



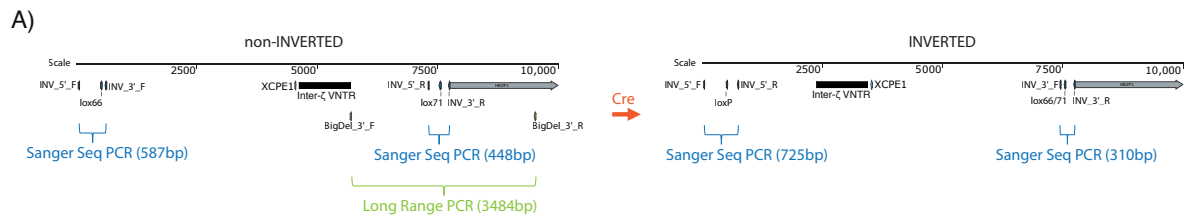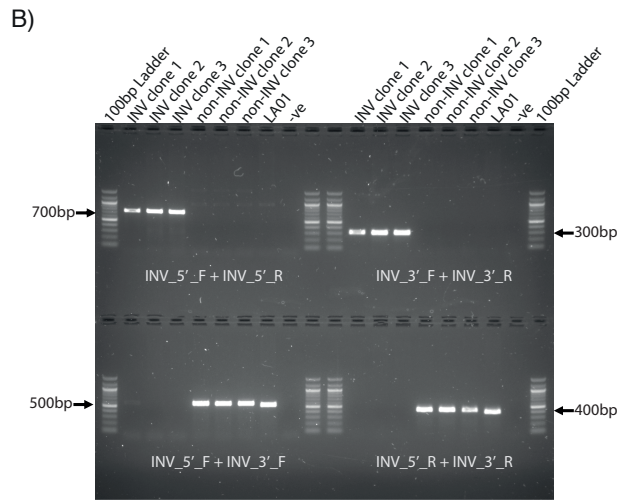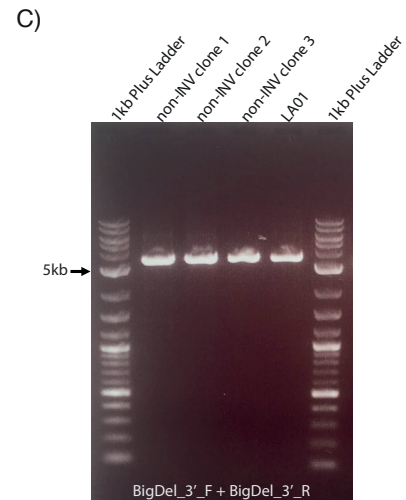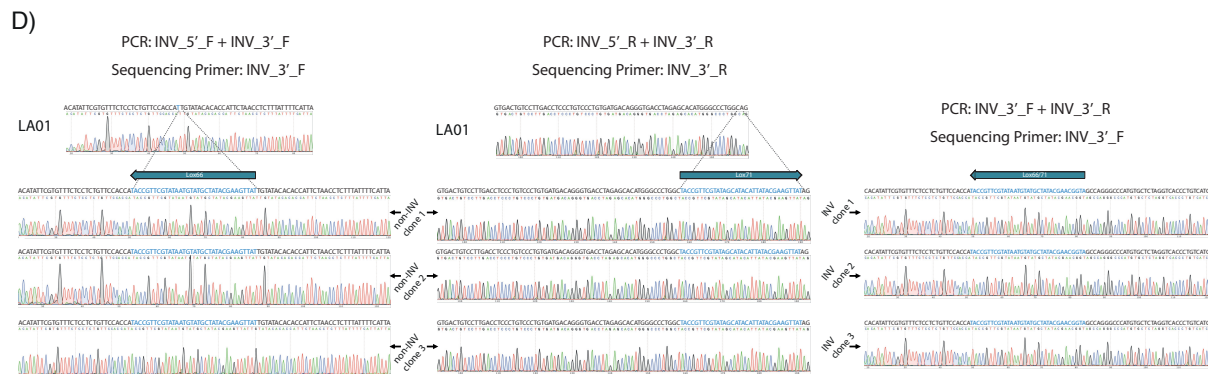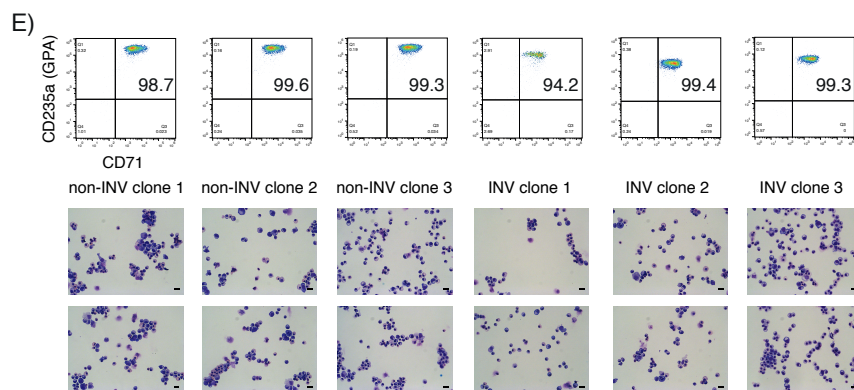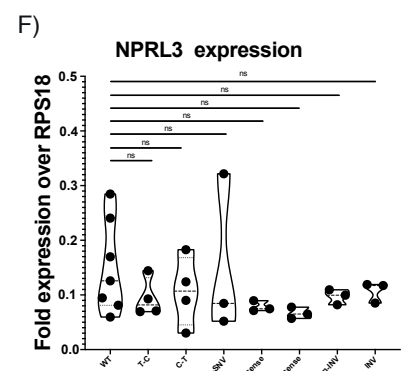

84

85 **Supplementary figure 5. Novel promoter inversion design and editing quality control.**

86 **A)** Illustration of a 10kb region around the novel promoter with promoter element XCPe1 in turquoise and heterotypical Lox  
 87 sites lox66 and lox71 in teal. The Sanger sequencing PCR fragments and associated primers are indicated in blue. The long-

88 range PCR fragment (3484bp) and associated primers are indicated in light green. Left panel shows the region before  
89 inversion and the right panel shows the region after Cre recombinase inverts the segment between the heterotypical Lox  
90 sites **B)** PCR genotyping for inversion fragment orientation: inversion produces a 725bp PCR product with primer pair  
91 INV\_5'\_F + INV\_5'\_R, and a 310bp product with pair INV\_3'\_F + INV\_3'\_R; if the fragment isn't inverted (and contains the  
92 lox sites) it would produce a 587bp PCR product with primer pair INV\_5'\_F + INV\_3'\_F, and a 448bp product with pair  
93 INV\_5'\_R + INV\_3'\_R. PCRs were performed on lox containing but non-inverted parental clones, on clones obtained after Cre  
94 mediated inversion and on isogenic control line LA01. Ladder is 100bp NEB. PCR was replicated twice; representative image  
95 is shown. **C)** Long range PCR screen for large deletions was performed at the 3' lox site using primer pair BigDel\_3'\_F +  
96 BigDel\_3'\_R on lox containing but non-inverted clones and isogenic control parental line LA01. Ladder is 1kb PLUS NEB. PCR  
97 was replicated twice; representative image is shown. **D)** Sanger sequencing traces for inverted clones and non-inverted  
98 parental clones, clone name and sequencing primer indicated in black. First two panels show traces from the 5' and 3' lox  
99 sites of non-inverted parental clone lines and the isogenic (non lox-containing line) control LA01, the last panel shows  
100 sequencing traces from the inverted clones at the 3' lox site. After inversion the heterotypical lox66 and lox71 produce a  
101 perfect loxP site at the 5' lox site and hybrid lox66/71 site at the 3' lox site with diminished recombination activity towards  
102 loxP. **E)** First panel: representative FACS analysis for cell surface iron Transferrin receptor - 1 (CD71) and cell surface  
103 glycoprotein Glycophorin A (CD235a or GPA) on day 21 of differentiation. Second panel: modified Wright stain of  
104 differentiation culture cells at day 21. Black bar represents 10µm. Each clone was differentiated once. Line names are shown  
105 in black. **F)** qPCR quantification of NPRL3 in reference to RPS18 in mRNA obtained from 3 independent wild type iPSC lines  
106 (WT), 4 T – C clones (labelled T - C), 4 C – T clones (labelled C - T), 3 iPSC clones obtained from the same patient material  
107 (CSNV), 3 clones of Promoter Insertion cells either in sense (P-In sense) or antisense (P-In antisense), 3 clones of non-inverted  
108 cells (nonINV), 3 clones of inverted cells (INV) differentiated to erythroblasts. Violin plots display median (dotted black line)  
109 quartile lines (coloured dotted line) and individual data points (black dots). P-values are obtained using unpaired, two-tailed  
110 student t-test.

| Target                      | Function/Name       | Sequence 5' to 3'                                                                                                                              |
|-----------------------------|---------------------|------------------------------------------------------------------------------------------------------------------------------------------------|
| HBA2 Promoter Custom TaqMan | Forward primer      | GGGCCGGCACTCTTCTG                                                                                                                              |
|                             | Probe               | CCCACAGACTCAGAGAGAACCACCATG                                                                                                                    |
|                             | Reverse primer      | GGCCTTGACGTTGGTCTTGT                                                                                                                           |
| HS -40 Custom TaqMan        | Forward primer      | CAGGCTCCAGGCCATATC                                                                                                                             |
|                             | Probe               | TGCCCAAGAGCTCTTCTGCAACC                                                                                                                        |
|                             | Reverse primer      | CCTCTGCACGTGCTTTGAC                                                                                                                            |
| SNV Custom TaqMan           | Forward primer      | GGAGGCGGGACACAAGACTA                                                                                                                           |
|                             | Probe               | CCTTGCACCAACAGCTTTTCCCTTTCTT                                                                                                                   |
|                             | Reverse primer WT   | CAAGCCATGGAAATACCAAGAG                                                                                                                         |
| Negative 14A Custom TaqMan  | Forward primer      | AACTGCCTTTGCACCTCAT                                                                                                                            |
|                             | Probe               | TGTAGGCAGTCCCAGTCCCAGAGG                                                                                                                       |
|                             | Reverse primer      | GCTTACCTTTTCTGGGCTACA                                                                                                                          |
| Negative 14B Custom TaqMan  | Forward primer      | CAGCCAATACAATCAGAACAAGT                                                                                                                        |
|                             | Probe               | TTTATGGTATCCTCAAGGCTTGCTGCC                                                                                                                    |
|                             | Reverse primer      | GTTTGCACACTGACTGTGTGA                                                                                                                          |
| 5' RACE Primer              | 5' RLM-RACE Primer  | AAGAGCTTCTTGACCAACAGCT                                                                                                                         |
| SNV Sanger Seq PCR          | GATAnewF            | CATTGTTGAGATGTTTGTCTGGAGACACAGATG                                                                                                              |
|                             | GATAnewR            | GAAATACCAAGAGCTTCTTGACCAACAGCT                                                                                                                 |
| SNV Long range PCR          | LR_GATA_PCR_F       | GCTCCTTTGAGCTTACATTTAGTGG                                                                                                                      |
|                             | LR_GATA_PCR_R       | CAGCACCAGTCTTTTCTCCCTGTAGCT                                                                                                                    |
| SNV Southern Blot Probe     | Southern Blot Probe | CTTCTCTGGAGCCCTTGGAGAGGGGTATGCAAAATATCCGTACTTAAATATCCCTCATATACGTGTATTTCTTAAATCAACAGGACATTAGGCTGCACAGCCAGAGAACACCATCAAATCAGGTTAATATGATCCAAATCCA |
| Insertion Sanger Seq PCR    | Sanger_Primer_F     | ACAAAAGTGGGGAAGGCTGAAAGACT                                                                                                                     |
|                             | Sanger_Primer_R     | ACAGAAAGCAAGGCTGCCTAGT                                                                                                                         |
| Insertion Inner Primers     | Sanger_Int_F        | CCTCAGGAAGGAAGGCGTAGTCA                                                                                                                        |
|                             | Sanger_Int_R        | GTCCCTCATCTGTGTCTCCAGCAATCATC                                                                                                                  |
| Insertion Long Range PCR    | R3_BigDel_F         | ACGTGTAGCAGAGACGCTGTTTACAG                                                                                                                     |
|                             | R3_BigDel_R         | TGTGGAGTGAAGGTTTTCCGTCTAGT                                                                                                                     |
| Lox Site Sanger Seq PCR     | INV_5'_F            | AGACCTGAAAACCCAGGTGTCATCATC                                                                                                                    |
|                             | INV_5'_R            | GCTCAGAGTGTCCCTACAAGGCTAC                                                                                                                      |
|                             | INV_3'_F            | GTCACACGCGCCTCATACATAGTTATGC                                                                                                                   |
|                             | INV_3'_R            | CCTATCGTCTGTCTCCCTTCTGC                                                                                                                        |
| 3' Lox Site Long range PCR  | BigDel_3'_F         | GGCTTGACGTACAGGGAGAAAAGAC                                                                                                                      |
|                             | BigDel_3'_R         | CACCTTGAAGTTGACCGGTTCCAC                                                                                                                       |

| Target gene ID | Target gene name      | TaqMan assay ID |
|----------------|-----------------------|-----------------|
| HBA1/2         | α-globin              | Hs00361191_g1   |
| HBB            | β-globin              | Hs00747223_g1   |
| HBD            | δ-globin              | Hs00426283_m1   |
| HBE1           | ε-globin              | Hs00362216_m1   |
| HBG1/2         | γ-globin              | Hs00361131_g1   |
| HBZ            | ζ-globin              | Hs00923579_m1   |
| RPS18          | Ribosomal protein S18 | Hs01375212_g1   |

| Capture viewpoint | Capture fragment coordinates (hg18) | Probe Sequence                                                                                                                                                                                                                                 |
|-------------------|-------------------------------------|------------------------------------------------------------------------------------------------------------------------------------------------------------------------------------------------------------------------------------------------|
| Enhancer R2       | chr16: 103,619 -103,765             | [Bt1]CATGACTCAGTCTTGGAGCCCAACAGGACTGCTGAGTATCCTTGGGGTGGAGTGGGACAGGGAAGGGGTGAATGGTACTGCTGATTACACCTCTGGTCTGCCCTCCCT<br>[Bt2]AGGACTGCTGAGTCACTCTGTGGGGTGGAGTGGGCAAGGGAAGGGGTGAATGGTACTGCTGATTACACCTCTGGTCTGCCCTCCCTCTGTTATCTGAGAGGGAAGGCCATG      |
| SNV fragment      | chr16: 149,664-150,998              | [Bt1]CATGTTGTAGCAGGATGGGTGCTGAGTGCACACCCACATTTAGAAAAAACAGCAGGCTTGGGGTGGAGGCGGACACAAGACTAGCAGAGGAGAAAGAGTGAAGGC<br>[Bt2]TGCACTACAGGAGAAAGACTTGGTCTGTGGGCTGCCTTGGGGTGGTGGTACAGCCCTTATCTGCTGCCCTCAGGATCTCCGGCCCTCTGTCAGGCCCTGCAACCCATG            |
| HBA1              | chr16: 165,923-166,718              | [Bt1]CATGGTAGCACAGGCGAGCTAAGATGCAAGTCTGAAGGAGGAGTCTGGGAGCTGCTCTGCAGTTCCTGGACCAGAAAGATGAGTACAGATTCATTTGAGCAAAAGATTCCAGG<br>[Bt2]AGAAGTCTCAAGGGCTGTCCACCTGCCCTGGAGGACACGCCCTGGAGGACATATAAGTCTACTGCTGACAGTCCAGACACTCTGATCTGACAGACTCAGGAAGAACCATG  |
| HBA2              | chr16: 162,119-162,914              | [Bt1]CATGGTAGCACAGGCGAGCTAAGATGCAAGTCTGAAGGAGGAGTCTGGGAGCTGCTCTGCAGTTCCTGGACCAGAAAGATGAGTACAGATTCATTTGAGCAAAAGATTCCAGG<br>[Bt2]AGAAGTCTCAAGGGCTGTCCACCTGCCCTGGAGGACACGCCCTTGGAGGACATATAAGTCTACTGCTGACAGTCCAGACACTCTGATCTGACAGACTCAGGAAGAACCATG |

| Editing primers and ssODN                                | Function                                                                                                                       | Oligo Sequence                                                                                                                                                                                                                                                                                                                                                                                                                                                                                                                                                                                                                                                                                                                                                                                  |
|----------------------------------------------------------|--------------------------------------------------------------------------------------------------------------------------------|-------------------------------------------------------------------------------------------------------------------------------------------------------------------------------------------------------------------------------------------------------------------------------------------------------------------------------------------------------------------------------------------------------------------------------------------------------------------------------------------------------------------------------------------------------------------------------------------------------------------------------------------------------------------------------------------------------------------------------------------------------------------------------------------------|
| sgRNA recognising T allele of C-SNV                      | T-C sgRNA sense cloning oligo for PX459 V2.0<br>T-C sgRNA antisense cloning oligo for PX459 V2.0                               | caccGTATGAGAAAATACAGCAC<br>aaacGTGCTGTTATTTCTAATAC                                                                                                                                                                                                                                                                                                                                                                                                                                                                                                                                                                                                                                                                                                                                              |
| sgRNA recognising C allele of C-SNV                      | C-T sgRNA sense cloning oligo for PX459 V2.0<br>C-T sgRNA antisense cloning oligo for PX459 V2.0                               | caccGTATGAGAAAATACAGCAC<br>aaacGTGCTGTTATTTCTGATAC                                                                                                                                                                                                                                                                                                                                                                                                                                                                                                                                                                                                                                                                                                                                              |
| ssODN repair template for T to C edit                    | T-C ssODN asymmetric repair template                                                                                           | GAAATACCAAGAGCTTCTTGCACCAACAGCTTTTCCCTTTCTTCTCTTGGTGTGTTGTGTCGGCCCTCCACCAAGCCTGTGCTGTTATTTCTGATAATGTTGGTGTGGCAGCTCAG                                                                                                                                                                                                                                                                                                                                                                                                                                                                                                                                                                                                                                                                            |
| ssODN repair template for C to T edit                    | C-T ssODN asymmetric repair template                                                                                           | GAAATACCAAGAGCTTCTTGCACCAACAGCTTTTCCCTTTCTTCTCTTGGTGTGTTGTGTCGGCCCTCCACCAAGCCTGTGCTGTTATTTCTGATAATGTTGGTGTGGCAGCTCAG                                                                                                                                                                                                                                                                                                                                                                                                                                                                                                                                                                                                                                                                            |
| sgRNA recognising promoter insertion site                | Promoter insertion sgRNA sense cloning oligo for PX459 V2.0<br>Promoter insertion sgRNA antisense cloning oligo for PX459 V2.0 | caccGGTGGTCCCTAGTCTGTGAGG<br>aaacCTCACAGACTAGGGACCACC                                                                                                                                                                                                                                                                                                                                                                                                                                                                                                                                                                                                                                                                                                                                           |
| ssODN sequence for promoter insertion in antisense (Vas) | Vas long ssODN repair template with 60bp homology arms                                                                         | GACATGAATGAATCTTCTAAGGAAATGTCCTCAATATGGGAAAGCAAAATCCTCCTAAGCGTGGAAATACCAAGAGCTTCTTGCACCAACAGCTTTTCCCTTTCTTCTGCTTGGCTAGTCT<br>TGTGTCGGCTCCACCAAGCTGTGCTGTTATTTCTGATAATGTTGGTGTGGCAGCTCAGCACCCTCTGTCTACAACATGACATTAGCTCCATCTGCTGCTGGTCTCCATTGATGGTGTG<br>CCATACAGACTCTCTTCCGACTCAGGCCAGGGCTGATCCAGGATGTTTGTGCTCATCTGTGCTCTCAGCAATCATCTCAACAATGGAACCTGAAAGTCTCCCAAGCTCTCAGG<br>TGTCTTCCCTGGATCCTGACTACTGCTTCTTCTGAGGCTCAGGCCGAGAGACAGCACCCTGCACACCCCACTCACTCTGAATCATACATAGGAGAAAGAGACAGAGCCCTCTGCT<br>CTCCCTCTATCCCTAGCTCTGCGCCTCCCTGAAAGCCTTCCCTAGTATTGCTCCTCAATGTCACAGCTTAATAGACTACAGTGGCAGCAACCTTTAAATCTGAATCTCCCTCT<br>CTGCTAAGCCCTACTTGGCTGCTTTCTTATCCAGGAAAGAAATGTTTCTGTTTACAGTCCACTAGAATGTAAGTCAAGAGAGCTTCAGGAATCACAGACTAGGGACCAAGTACATTA<br>TATGCTTAGCTAGGATTGAAAGCAAGAGCA                 |
| ssODN sequence for promoter insertion in sense (Vs)      | Vs long ssODN repair template with 60bp homology arms                                                                          | GACATGAATGAATCTTCTAAGGAAATGTCCTCAATATGGGAAAGCAAAATCCTCCTAATCTGAAAGCTCCTTGAAGTACATTCTAGGACTGTAACAGAAACATTTTTTTCTGTTGGATAA<br>AGAAAAGCAGGGCAAGTAGGGCTTAGACAGAGGAGGGAGGATTGAGTTTAAATGGGTTGGCAGCTAGGCTATTAACTGGTGCATTTGAGGAGTGGCAATACAGGAAAGGGCTTCAGGGGA<br>GTGGCAGGAGCTAGGGATAGAGGAGGGAGGACAGGAGGCTTGTGCTTTTCTCCATATGTAAGTTTCAAGGAGTGGTGGGGGTGTCAGGGTGTGCTGCTCCGGCTGAGCTCAGGAAAGGAA<br>GGCAGTGTCCGGATGCTCAGGAAAGGACAGTGGAGTGGCTTTTGGGAACTTCCAGGTTCCATTTGAGATGTTTGTGAGACACAGATGAGGACATCAATACATCTCCGGATCAGGCTCTG<br>GGCTGAGTCCGGAAAGAGGCTGTATGACACACCATCAATGGGAGCACAGGACACAGATGGAGGCTAATGTATGTTGAGACAGGATGGTGTGCTGAGCTCCACACCCACATATCAGAAAATAA<br>CAGCACAGGCTTGGGTTGGAGGCGGACAAAGACTAGCCAGAGGAGGAAAGGTTGAAAGCTTGGTGAAGGAGCTTGTGTTTCAAGGCTTCCAGACTAGGGACCAAGTACATTA<br>TATGCTTAGCTAGGATTGAAAGCAAGAGCA |
| sgRNA recognising 5' Lox insertion site                  | 5' Lox66 insertion sgRNA sense cloning oligo for PX459 V2.0<br>5' Lox66 insertion sgRNA antisense cloning oligo for PX459 V2.0 | caccGGAATGGTGTATACAATGG<br>aaacCCATTGTATACACACCATTC                                                                                                                                                                                                                                                                                                                                                                                                                                                                                                                                                                                                                                                                                                                                             |
| sgRNA recognising 3' Lox insertion site                  | 3' Lox71 insertion sgRNA sense cloning oligo for PX459 V2.0<br>3' Lox71 insertion sgRNA antisense cloning oligo for PX459 V2.0 | caccGGAATGGATCGTCCCTCTGCC<br>aaacGGCAGAGGAGCATCCATTCC                                                                                                                                                                                                                                                                                                                                                                                                                                                                                                                                                                                                                                                                                                                                           |
| ssODN repair template for 5' Lox insertion               | 5' Lox66 ssODN asymmetric repair template                                                                                      | CACACATGTCACAGCAGCTCATACATAGTTATGATAGCTCACAATATGTCACACACATATCGTGTTCCTCTGTTCCACCACTACCGTTCGTATAATGATGCTATACGAAGTATGATAC<br>ACACATTTCACTCTTTATTTTCAT                                                                                                                                                                                                                                                                                                                                                                                                                                                                                                                                                                                                                                              |
| ssODN repair template for 3' Lox insertion               | 3' Lox71 ssODN asymmetric repair template                                                                                      | TCAGCCAGCCCGACTGGCTCAGAGGAGTGTCTTGCACCTCCCTGTGATGACAGGAGTACAGTACAGGAGTGGCCCTGGCTACCGTTCGTATAATGATGCTATACGAAGTATGATAGGGA<br>CGATCCTTCTCACTTCACTGAAGCTTC                                                                                                                                                                                                                                                                                                                                                                                                                                                                                                                                                                                                                                          |
